# Supplementary material
Source: PubMed Central journal article supplement (PMC4012582)
Supplement: supp_pp.113.228080_228080revS1_RR_full_2014_03_12.pdf [file supp_pp.113.228080_228080revS1_RR_full_2014_03_12.pdf]

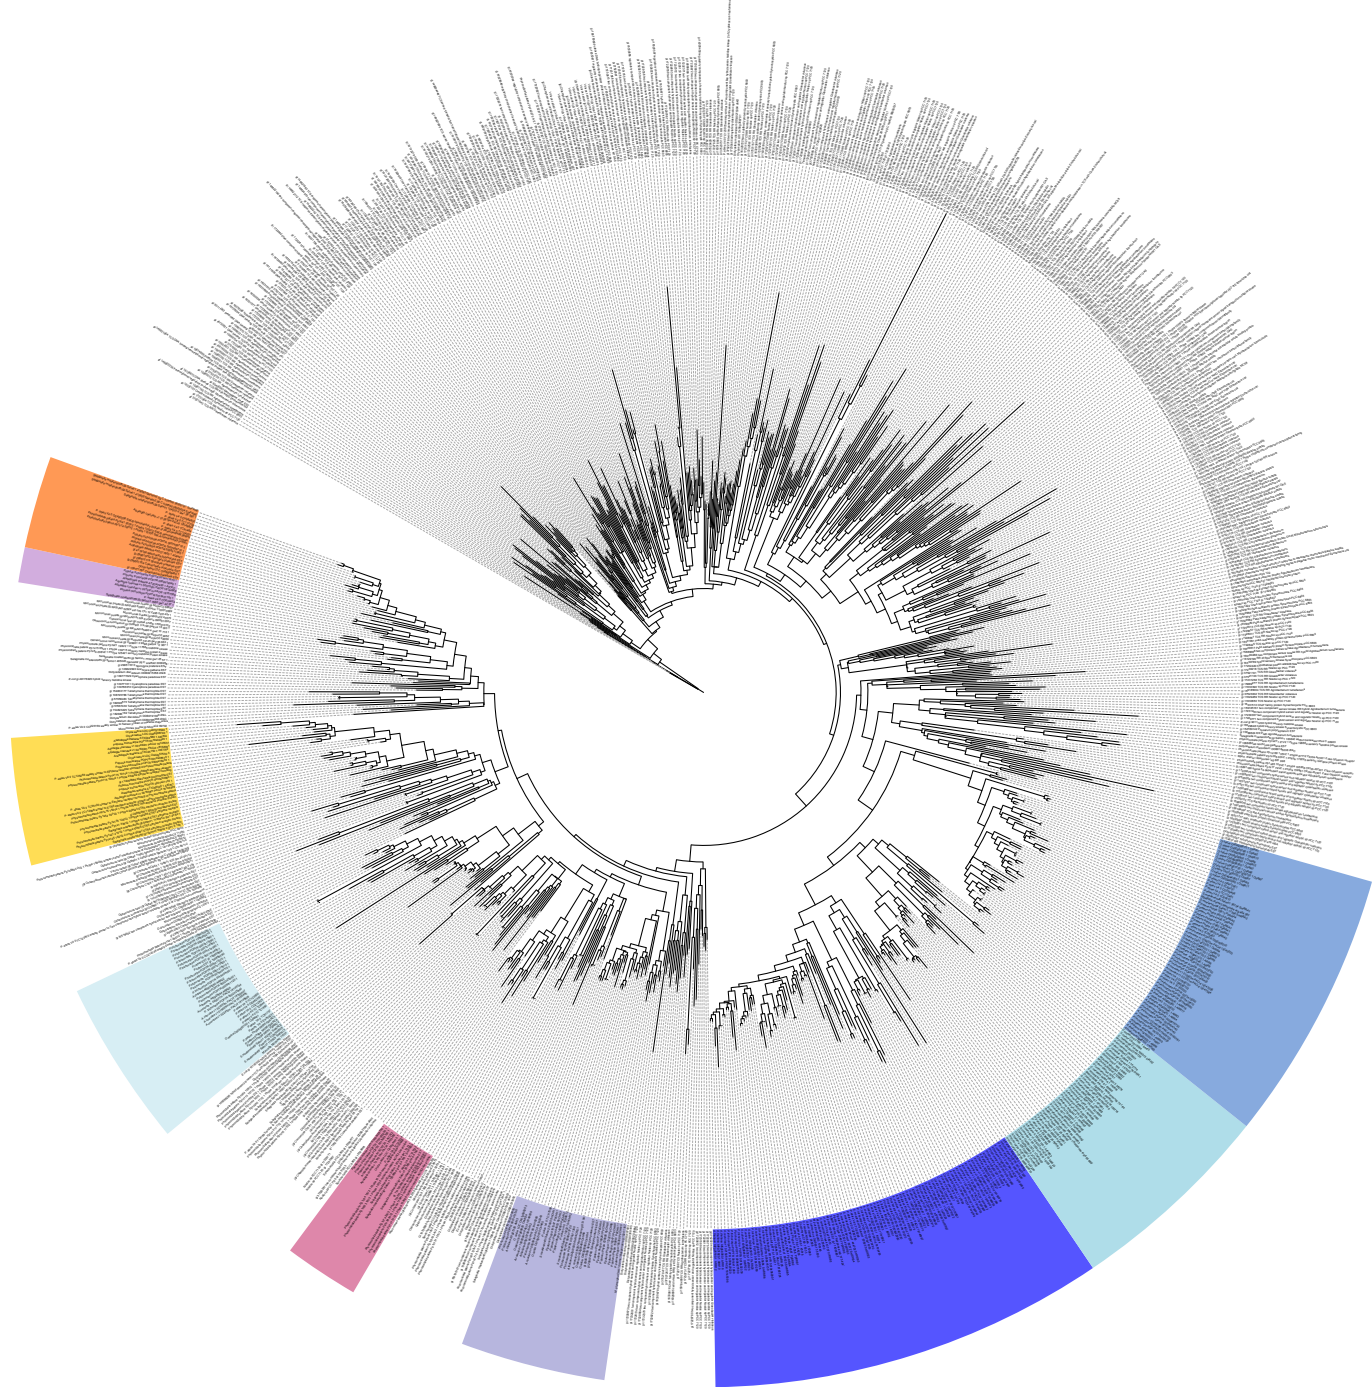

**Color ranges:**

Cytokinin

CK12

CK11

AHK1

Ethylen

C Type RR

A Type RR

PSEUDO RR

B Type RR

**Supplemental Figure S1.** Phylogenetic tree for the response regulator domains. All response regulator domains from the dataset were aligned and a Maximum Likelihood tree was calculated.
